# Supplementary material
Source: publisher site journal article supplement (https://www.dovepress.com/article/392977)
Supplement: Supplementary file 1 [file SuppFig1_Revise.pdf › SuppFig1_Revise.pdf]

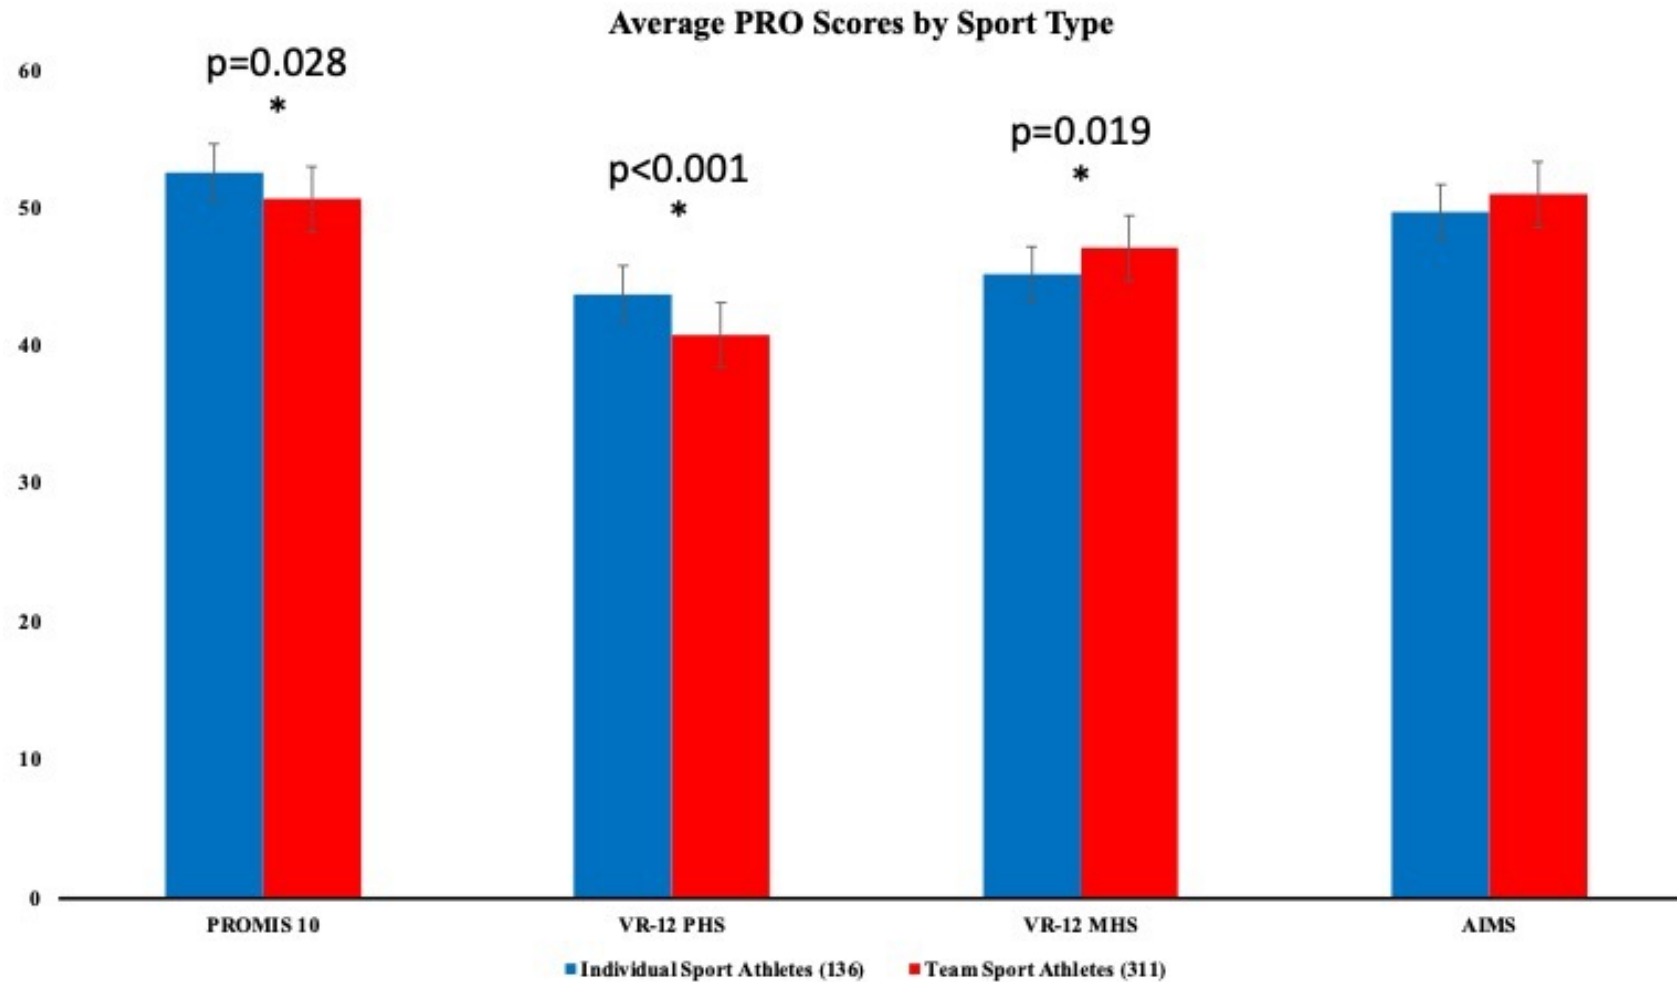

**Supplementary Figure 1:** Individual sport athletes scored significantly worse on VR-12 mental health ( $p=0.019$ ) and PROMIS Depression ( $p=0.028$ ) measures, but better ( $p<0.001$ ) on VR-12 physical health scores compared to team sport athletes. \* $p<0.05$
